# Supplementary material for: An LC-MS/MS method for the quantification of 3-bromotyrosine in plasma from patients diagnosed with eosinophilic esophagitis
Source: Royal Society of Chemistry journal article supplement (doi:10.1039/d4ay00697f), 2024-01-01
Supplement: d4ay00697f3.pdf [file d4ay00697f3.pdf]

### SPE Manifold Description

This SPE manifold is made with Elegoo standard photopolymer resin and includes a top and bottom piece printed separately. The manifold allows for the processing of 3 samples simultaneously under positive pressure. Viton rubber was stuck to the bottom of the manifold between the two parts to create an airtight seal. The two parts were held together with four binder clips on each side. Tygon tubing was used to connect the top of the manifold to a ¼ in Teflon tube tightened by a copper wire. The Teflon tube was connected to a control valve with push-to-connect (PTC) fittings. The control valve was connected to a 1-5 psi pressure gauge with PTC connectors. The pressure gauge was connected to a 1 psi pressure regulator with PTC connectors. Teflon tubing was used to connect the regulator to house air by a PTC connector. This manifold was made to fit Waters HLB cartridges but can easily be modified to fit any SPE cartridge.
